# Supplementary material
Source: HighWire-hosted journal article supplement (https://jnm.snmjournals.org/highwire/filestream/94296/field_highwire_adjunct_files/0/94771_Supplemental_Data.pdf)
Supplement: 94771_Supplemental_Data.pdf [file 94771_Supplemental_Data.pdf]

**Supplemental Table 1. Patient characteristics and previous treatments**

| No. | Gender       | Age (y) | Total thyroid-ectomy | Neck lymph-node dissection and/or extirpation | Other metastatic operations | Radiation therapy for neck | Octreotide        | Interferon | Chemo-therapy | Ct in study day (pmol/L) | CEA in study day (µg/L) | Time interval between diagnosis and study |
|-----|--------------|---------|----------------------|-----------------------------------------------|-----------------------------|----------------------------|-------------------|------------|---------------|--------------------------|-------------------------|-------------------------------------------|
| 1   | F            | 47      | 1996                 | 2010                                          | -                           | -                          | -                 | -          | -             | 50.0                     | 4.8                     | 11 y                                      |
| 2   | M            | 37      | 2007                 | 2007                                          | 2007, 2009, 2010            | planned                    | -                 | -          | -             | 118.0                    | 4.0                     | 7 mo                                      |
| 3   | F            | 55      | 1995                 | 2005                                          |                             | -                          | -                 | -          | -             | 56.8                     | 5.7                     | 13 y                                      |
| 4   | M<br>(MEN2A) | 49      | 1986                 | several<br>(1994-2009)                        | 2008                        | -                          | 2009              | -          | -             | 2080.0                   | 132.3                   | 21 y                                      |
| 5   | M            | 54      | 2005                 | 2005, 2008                                    | 2006                        | 2006                       | -                 | -          | -             | 31.9                     | 6.4                     | 3 y                                       |
| 6   | M            | 69      | 1986                 |                                               |                             | -                          | -                 | -          | -             | 94.2                     | 30.5                    | 19 y                                      |
| 7   | M            | 47      | 1994                 | several<br>(1994-96,<br>2003, 2006,<br>2008)  | 2008                        | -                          | 2008              | -          | -             | 499.0                    | 16.0                    | 13 y                                      |
| 8   | M<br>(MEN2A) | 49      | 1998                 | 2007                                          | 2008                        | -                          | -                 | -          | -             | 16.6                     | 2.1                     | 9 y                                       |
| 9   | M            | 50      | 2005                 | 2005, 2006                                    | -                           | 2006                       |                   | 2006       | -             | 2840.0                   | 230.0                   | 3 y                                       |
| 10  | M            | 56      | 2006                 | 2006                                          | -                           | -                          | 2006              | -          | 2006          | 1598.2                   | 460.0                   | 2 y                                       |
| 11  | F            | 61      | 1999                 | 2009                                          | -                           | -                          | -                 | -          | -             | 44.8                     | 2.0                     | 9 y                                       |
| 12  | F            | 56      | 1999                 |                                               | -                           | -                          | -                 | -          | -             | 28.7                     | 2.2                     | 9 y                                       |
| 13  | F            | 30      | 2007                 | 2009                                          | -                           | -                          | -                 | -          | -             | 21.7                     | 1.9                     | 1 y 6 mo                                  |
| 14  | M            | 59      | 2006                 | -                                             | -                           | -                          | -                 | -          | -             | 2860.0                   | 82.6                    | 3 y                                       |
| 15  | F            | 47      | 2007                 | -                                             | -                           | -                          | -                 | -          | -             | 13.8                     | 2.0                     | 2 y                                       |
| 16  | F            | 74      | 2008                 | 2008                                          | -                           | -                          | -                 | -          | -             | 69.4                     | 7.3                     | 1 y 4 mo                                  |
| 17  | F<br>(MEN2B) | 31      | 1984                 | several<br>(1985-1999)                        | -                           | 2001                       | 1998              | -          | 1999-<br>2000 | 2478.0                   | 110.0                   | 25 y                                      |
| 18  | F            | 36      | 2009                 | 2009                                          | -                           | 2009                       | sorafenib<br>2009 | -          | -             | 72.0                     | 12.5                    | 4 mo                                      |
| 19  | M            | 74      | 2008                 | 2008, 2010                                    | -                           | 2010                       | -                 | -          | -             | 62.9                     | 2.1                     | 1 y 4 mo                                  |

**Supplemental Table 2. Number of lesions in different regions in imaging studies**

**a. neck**

| No | <sup>18</sup> F-DOPA<br>PET/CT | <sup>18</sup> F-FDG<br>PET/CT | MDCT    | MRI       | Neck US   |
|----|--------------------------------|-------------------------------|---------|-----------|-----------|
| 1  | 0                              | 0                             | 0       | 0         | 0         |
| 2  | 1 (H)                          | 1 (H)                         | 1 (H)   | 1 (H)     | 1 (H)     |
| 3  | 1 (H)                          | 1 (H)                         | 0       | 0         | 0         |
| 4  | 0                              | 2 (H)                         | 0       | 2 (H)     | 2 (H)     |
| 5  | 0                              | 2 (FP, H)                     | 0       | 1 (FP, H) | 1 (FP, H) |
| 6  | 0                              | 0                             | 0       | 0         | 0         |
| 7  | 1 (H)                          | 1 (H)                         | 1 (H)   | 1 (H)     | 0         |
| 8  | 1 (H*)                         | 0                             | 0       | 3 (FP, H) | 0         |
| 9  | 5 (noH)                        | 0                             | 0       | 0         | 0         |
| 10 | 0                              | 2 (noH)                       | 3 (noH) | 5 (noH)   | ND        |
| 11 | 1 (H)                          | 0                             | 0       | 0         | 0         |
| 12 | 0                              | 0                             | 0       | 0         | 0         |
| 13 | 0                              | 0                             | 0       | 1 (FP, H) | 0         |
| 14 | 2 (noH)                        | 5 (noH)                       | 0       | 3 (noH)   | 7 (noH)   |
| 15 | 0                              | 0                             | 0       | ND        | 0         |
| 16 | 0                              | 0                             | 0       | ND        | 0         |
| 17 | 0                              | 5 (noH)                       | 1 (noH) | 2 (noH)   | ND        |
| 18 | 2 (H)                          | 2 (H)                         | 0       | 4 (H)     | 3 (H)     |
| 19 | 3 (H)                          | 0                             | 0       | 6 (H)     | 1 (H)     |

\* parathyroid adenoma

**b. lungs**

| No | <sup>18</sup> F-DOPA<br>PET/CT | <sup>18</sup> F-FDG<br>PET/CT | MDCT    | MRI     |
|----|--------------------------------|-------------------------------|---------|---------|
| 1  | 0                              | 0                             | 0       | 0       |
| 2  | 0                              | 0                             | 0       | 0       |
| 3  | 0                              | 0                             | 0       | 0       |
| 4  | 0                              | 0                             | 0       | 0       |
| 5  | 0                              | 0                             | 0       | 0       |
| 6  | 3 (H)                          | 2 (H)                         | 2 (H)   | 4 (H)   |
| 7  | 0                              | 0                             | 0       | 0       |
| 8  | 0                              | 0                             | 0       | 0       |
| 9  | 0                              | 0                             | 0       | 0       |
| 10 | 0                              | 0                             | 0       | 0       |
| 11 | 0                              | 0                             | 0       | 0       |
| 12 | 0                              | 0                             | 0       | 0       |
| 13 | 0                              | 0                             | 0       | 0       |
| 14 | 0                              | 0                             | 0       | 0       |
| 15 | 0                              | 0                             | 0       | ND      |
| 16 | 0                              | 0                             | 0       | ND      |
| 17 | 0                              | 0                             | 1 (noH) | 3 (noH) |
| 18 | 0                              | 0                             | 0       | 1 (H)   |
| 19 | 0                              | 0                             | 0       | 0       |

**c. mediastinum**

| No | <sup>18</sup> F-DOPA<br>PET/CT | <sup>18</sup> F-FDG<br>PET/CT | MDCT    | MRI     |
|----|--------------------------------|-------------------------------|---------|---------|
| 1  | 0                              | 0                             | 0       | 0       |
| 2  | 0                              | 0                             | 0       | 0       |
| 3  | 0                              | 0                             | 0       | 0       |
| 4  | 0                              | 0                             | 0       | 0       |
| 5  | 0                              | 0                             | 0       | 0       |
| 6  | 0                              | 0                             | 0       | 1 (noH) |
| 7  | 0                              | 0                             | 0       | 0       |
| 8  | 0                              | 0                             | 0       | 0       |
| 9  | 0                              | 0                             | 0       | 0       |
| 10 | 0                              | 0                             | 0       | 0       |
| 11 | 0                              | 0                             | 0       | 0       |
| 12 | 0                              | 0                             | 0       | 0       |
| 13 | 0                              | 0                             | 0       | 0       |
| 14 | 8 (noH)                        | 3 (noH)                       | 7 (noH) | 5 (noH) |
| 15 | 0                              | 0                             | 0       | ND      |
| 16 | 0                              | 0                             | 0       | ND      |
| 17 | 5 (noH)                        | 5 (noH)                       | 5 (noH) | 3 (noH) |
| 18 | 10 (H)                         | 6 (H)                         | 2 (H)   | 6 (H)   |
| 19 | 0                              | 0                             | 0       | 1 (noH) |

**d. liver**

| No | <sup>18</sup> F-DOPA<br>PET/CT | <sup>18</sup> F-FDG<br>PET/CT | MDCT        | MRI       |
|----|--------------------------------|-------------------------------|-------------|-----------|
| 1  | 0                              | 0                             | 0           | 0         |
| 2  | 0                              | 0                             | 0           | 0         |
| 3  | 0                              | 0                             | 0           | 0         |
| 4  | 4 (H)                          | 1 (H)                         | 2 (H)       | >10 (H)*  |
| 5  | 0                              | 0                             | 2 (FP, noH) | NA        |
| 6  | 0                              | 0                             | 0           | NA        |
| 7  | 0                              | 0                             | 0           | NA        |
| 8  | 0                              | 0                             | 0           | 0         |
| 9  | 7 (noH)                        | 1 (noH)                       | >10 (noH)   | >10 (noH) |
| 10 | 0                              | 10 (noH)                      | >10 (noH)   | >10 (noH) |
| 11 | 0                              | 0                             | 0           | NA        |
| 12 | 0                              | 0                             | 0           | NA        |
| 13 | 0                              | 0                             | 0           | NA        |
| 14 | 0                              | 0                             | 0           | 0         |
| 15 | 0                              | 0                             | 0           | ND        |
| 16 | 0                              | 0                             | 0           | ND        |
| 17 | 0                              | 0                             | 0           | 0         |
| 18 | 0                              | 0                             | 0           | 0         |
| 19 | 0                              | 0                             | 0           | 0         |

\* in addition metastasis in spleen detected without histological verification (retrospectively observed also in MDCT)

**e. skeleton**

| No | <sup>18</sup> F-DOPA<br>PET/CT | <sup>18</sup> F-FDG<br>PET/CT | MDCT    | MRI       |
|----|--------------------------------|-------------------------------|---------|-----------|
| 1  | 0                              | 0                             | 0       | 0         |
| 2  | 0                              | 0                             | 0       | 0         |
| 3  | 0                              | 0                             | 0       | 0         |
| 4  | 0                              | 1 (H)                         | 0       | 1(H)      |
| 5  | 0                              | 0                             | 0       | 0         |
| 6  | 3 (noH)*                       | 1 (FP, H)*                    | 0       | 1 (noH)*  |
| 7  | 0                              | 0                             | 0       | 0         |
| 8  | 0                              | 0                             | 0       | 0         |
| 9  | 2 (noH)                        | 0                             | 0       | 3 (noH)   |
| 10 | 0                              | 4 (noH)                       | 8 (noH) | >10 (noH) |
| 11 | 0                              | 0                             | 0       | 0         |
| 12 | 0                              | 0                             | 0       | 0         |
| 13 | 0                              | 0                             | 0       | 0         |
| 14 | 0                              | 0                             | 0       | 0         |
| 15 | 0                              | 0                             | 0       | ND        |
| 16 | 0                              | 0                             | 0       | ND        |
| 17 | 0                              | 0                             | 0       | 0         |
| 18 | 3 (noH)                        | 2 (noH)                       | 1 (noH) | 0         |
| 19 | 0                              | 0                             | 0       | 0         |

\* bone metastasis verified in <sup>18</sup>F-DOPA PET/CT and MRI and radiation therapy for bone metastases was given.  
<sup>18</sup>F-FDG PET/CT showed only uptake in femur and histology was benign
